# Supplementary material for: Effects of Pomegranate Peel Extract and/or Lactic Acid as Natural Preservatives on Physicochemical, Microbiological Properties, Antioxidant Activity, and Storage Stability of Khalal Barhi Date Fruits
Source: MDPI journal article supplement (doi:10.3390/foods12061160), 2023-03-09
Supplement: s1 [file s1]

## Supplementary file Manuscript ID: foods-2233688

**Table S1.** HPLC analysis of polyphenolic compounds in the standards.

| Polyphenolic compound | Conc. (µg/ml) |
|-----------------------|---------------|
| Gallic acid           | 15            |
| Chlorogenic acid      | 50            |
| Catechin              | 75            |
| Methyl gallate        | 15            |
| Caffeic acid          | 18            |
| Syringic acid         | 17.2          |
| Pyro catechol         | 40            |
| Rutin                 | 26            |
| Ellagic acid          | 120           |
| Coumaric acid         | 20            |
| Vanillin              | 12.9          |
| Ferulic acid          | 20            |
| Naringenin            | 30            |
| Daidzein              | 35            |
| Quercetin             | 40            |
| Cinnamic acid         | 10            |
| Apigenin              | 50            |
| Kaempferol            | 20            |
| Hesperetin            | 20            |

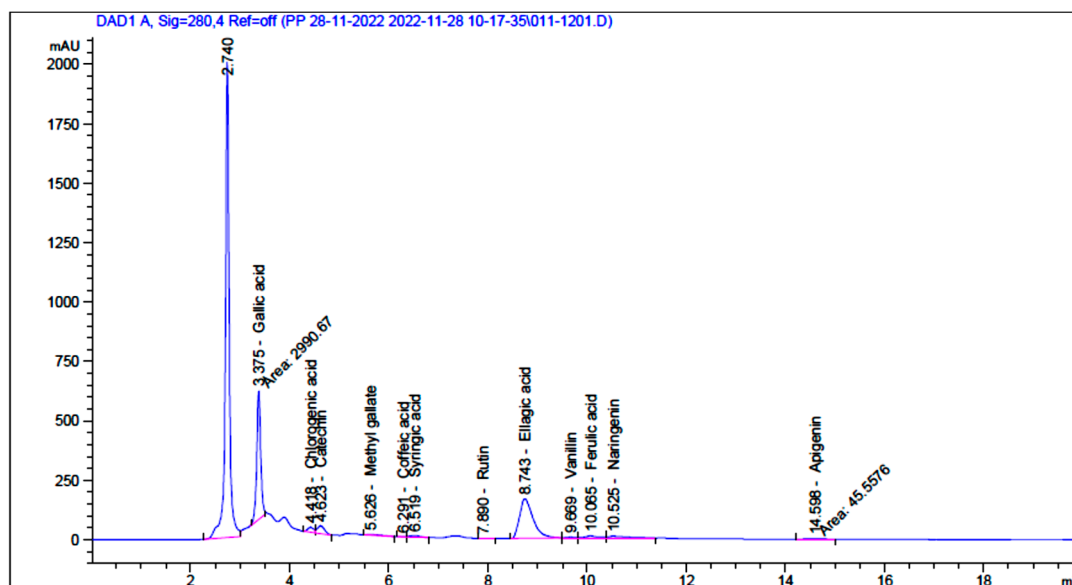

**Figure S1.** HPLC chromatogram of pomegranate peel extract.
